# Supplementary material for: Hair follicle dermal condensation forms via Fgf20 primed cell cycle exit, cell motility, and aggregation
Source: eLife. 2018 Jul 31;7:e36468. doi: 10.7554/eLife.36468 (PMC6107334; doi:10.7554/eLife.36468)
Supplement: Figure 1—source data 1. — Values for quantification of cell density in Fgf20+/- DC, Fgf20+/- IF, and Fgf20-/- sub-placodal dermis (Figure 1B). Values for quantification of Sox2+ cell number in stages I, II, III, and IV (Figure 1D). Values for quantification of Sox2+ cell distance to nearest placode surface in stages I, II, III, and IV (Figure 1E). Values for quantification of nuclear sphericity of Sox2+ (DC) and IF cells in stages I, II, III, and IV (Figure 1H). [file elife-36468-fig1-data1.xlsx]

## Sheet: Figure 1 
Figure 1B				Figure 1D					Figure 1E					Figure 1H
Fgf20+/- IF	Fgf20+/- DC	Fgf20-/- SPD		I	II	III	IV		I	II	III	IV		I		II		III		IV
0.000790353	0.00157804	0.000963415		7	40	49	45		47.2	3.77	6.04	4.14		DC	IF	DC	IF	DC	IF	DC	IF
0.000908221	0.00188976	0.000704762		24	23	42	44		8.2	26.7	4.56	3.26		0.484513	0.859518	0.573614	0.839115	0.77941	0.843702	0.564076	0.869561
0.00125342	0.00215686	0.000770548		31	11	65	50		1.55	20.1	3.82	2.63		0.63826	0.86755	0.89657	0.876629	0.729385	0.771154	0.640015	0.773458
0.00127742	0.00200935	0.00126852		36	30	46	49		7	12.95	4.72	3.92		0.639377	0.898894	0.640728	0.890703	0.764944	0.812795	0.862945	0.816114
0.00119373	0.00215517	0.00150393		31	29	71	50		9.17	13.2	4.96	5.32		0.778997	0.862227	0.530519	0.86879	0.6137	0.767921	0.846944	0.827648
		0.00176726		20	24	56	67		22.55	15.75	10.35	5.53		0.732975	0.887821	0.85106	0.863022	0.756232	0.812955	0.833661	0.863561
		0.000678161		15	19	30	72		18.6	2.95	2.01	6.06		0.825246	0.902162	0.863024	0.900936	0.609639	0.839366	0.538012	0.915395
				19		37	64		22.24		4.87	4.04		0.662566	0.908483	0.927568	0.840176	0.614961	0.780698	0.856024	0.879377
				13		57	72		15.2		5.23	4.62		0.685794	0.889837	0.720758	0.873874	0.755463	0.762685	0.821351	0.840324
				11		50	68		21.4		6.8	6.56		0.732975	0.907551	0.717246	0.865987	0.765342	0.816012	0.903926	0.904299
				12		54	82		26.05		6.27	5.7		0.866953	0.873093	0.674576	0.813099	0.773278	0.833076	0.772107	0.818346
							77					6.54		0.640218	0.917593	0.647693	0.798357	0.811994	0.874892	0.843543	0.829941
							70					1.62		0.807963	0.858891	0.855664	0.822681	0.809113	0.841929	0.77602	0.846793
							75					1.51		0.682068	0.892437	0.733431	0.781758	0.838655	0.933581	0.815902	0.883315
														0.780362	0.89151	0.62502	0.801627	0.781667	0.939871	0.86	0.893016
														0.737343	0.863542	0.822813	0.921272	0.649921	0.838357	0.628857	0.902468
														0.744765	0.848563	0.735347	0.835771	0.864375	0.743974	0.66976	0.906822
														0.766839	0.902136	0.60403	0.812598	0.833614	0.836024	0.551554	0.860826
														0.514861	0.896794	0.646869	0.801384	0.865346	0.794091	0.71975	0.837852
														0.812453	0.81828	0.622717	0.938104	0.659914	0.723298	0.475555	0.883212
														0.800952	0.758009	0.775521	0.769768	0.82496	0.7397	0.809313	0.874074
														0.858073	0.83117	0.588789	0.875184	0.774716	0.826885	0.805227	0.939357
														0.786872	0.922428	0.753347	0.786432	0.703835	0.806271	0.647975	0.935075
														0.757743	0.717254	0.60337	0.843458	0.788757	0.768404	0.785061	0.885424
														0.816202	0.895072	0.646791	0.885755	0.760509	0.923748	0.547648	0.925843
														0.752995	0.88446	0.794028	0.855175	0.814959	0.856352	0.52376	0.85938
														0.675348	0.825377	0.702445	0.821204	0.757951	0.914235	0.313277	0.827362
														0.838275	0.815825	0.783994	0.835795	0.735337	0.8315	0.595861	0.85243
														0.727212	0.856428	0.68781	0.904755	0.771321	0.72014	0.78938	0.83739
														0.716384	0.818842	0.550563	0.933189	0.624842	0.819726	0.673155	0.788225
														0.670785	0.807193	0.850192	0.881507	0.768219	0.78777	0.907657	0.788157
														0.86976	0.838095	0.809982	0.936892	0.737234	0.875515	0.490018	0.774794
														0.608543	0.823618	0.798427	0.880288	0.752668	0.853281	0.947981	0.803925
														0.615197	0.772038	0.830146	0.85162	0.648375	0.767421	0.910476	0.823247
														0.810094	0.848244	0.552881	0.896431	0.615788	0.820719	0.868417	0.810318
														0.667263	0.839923	0.727934	0.904272	0.790301	0.868223	0.822497	0.775731
														0.642929	0.810669	0.900229	0.827636	0.70286	0.839425	0.907483	0.778532
														0.748034	0.852116	0.632324	0.84175	0.665599	0.876224	0.569821	0.802122
														0.781712	0.870527	0.823229	0.884161	0.818331	0.85106	0.475811	0.892417
														0.82057	0.902183	0.777897	0.832096	0.720868	0.87123	0.839769	0.57861
														0.753179	0.857361	0.803504	0.826915	0.725859	0.805278	0.502683	0.831086
														0.580057	0.875165	0.843194	0.836862	0.521853	0.925762	0.590692	0.527411
														0.758842	0.744545	0.777554	0.85154	0.460244	0.81797	0.530189	0.813127
														0.65288	0.886299	0.759632	0.893856	0.784589	0.836114	0.81429	0.810111
														0.715045	0.868374	0.691935	0.908286	0.669393	0.866031	0.891416	0.954573
														0.640935	0.824145	0.75519	0.920919	0.706983	0.808968	0.877009	0.853209
														0.794164	0.746805	0.871395	0.849364	0.806422	0.872545	0.879828	0.87884
														0.779948	0.867178	0.904515	0.922382	0.752179	0.796992	0.832389	0.842628
														0.591424	0.887963	0.581985	0.925084	0.781614	0.85829	0.908884	0.920376
														0.752195	0.895843	0.83604	0.961938	0.747627	0.806172	0.674486	0.866507
														0.622587	0.835457	0.584951	0.935053	0.719307	0.811671	0.767518	0.631589
														0.538785	0.827298	0.830726	0.822484	0.710587	0.796977	0.8437	0.885728
														0.699074	0.833344	0.664699	0.888959	0.684768	0.802558	0.894824	0.808186
														0.749396	0.864871	0.816124	0.877812	0.766482	0.863677	0.568559	0.882085
														0.712954	0.894138	0.729181	0.873678	0.766514	0.865328	0.739563	0.788801
														0.782366	0.842356	0.650481	0.803279	0.748616	0.780057	0.576844	0.7978
														0.84934	0.793964	0.580388	0.826699	0.710493	0.884434	0.495515	0.623363
														0.872695	0.863033	0.791241	0.68295	0.758696	0.768143	0.664361	0.866431
														0.780321	0.886991	0.902348	0.860374	0.549593	0.838723	0.469411	0.820567
														0.808494	0.775467	0.652411	0.630387	0.571832	0.741562	0.454661	0.887617
														0.864586	0.832463	0.847401	0.839517	0.823589	0.901989	0.520579	0.832463
														0.826508	0.775855	0.637567	0.894852	0.644296	0.941519	0.601078	0.816797
														0.569908	0.808579	0.614861	0.925175	0.807688	0.796885	0.877603	0.808475
														0.560393	0.674115	0.687945	0.768156	0.832131	0.860872	0.647302	0.789352
														0.851767	0.698997	0.816697	0.79283	0.572867	0.874179	0.601054	0.825301
														0.737852	0.817481	0.782227	0.819626	0.738072	0.819978	0.64316	0.868777
														0.863135	0.810159	0.824459	0.868086	0.554925	0.785972	0.805008	0.899818
														0.861868	0.821451	0.787968	0.830803	0.743586	0.774439	0.532801	0.900397
														0.756548	0.761974	0.62427	0.6527	0.687351	0.823152	0.757175	0.851583
														0.722082	0.906767	0.724318	0.835187	0.651714	0.821927	0.838041	0.784131
														0.641936	0.914386	0.742781	0.822208	0.849492	0.817892	0.834998	0.722588
														0.897646	0.825964	0.619007	0.714454	0.640895	0.827595	0.79606	0.50764
														0.710355	0.923719	0.538224	0.790085	0.741982	0.873631	0.660405	0.920591
														0.726539	0.799041	0.629993	0.745096	0.875031	0.890796	0.76328	0.819407
														0.767114	0.805023	0.828821	0.796445	0.561175	0.833667	0.802183	0.885527
														0.808783	0.759233	0.858079	0.885227	0.759625	0.817669	0.792102	0.799263
														0.555779	0.851382	0.720761	0.871277	0.740834	0.789164	0.767472	0.863269
														0.609842	0.814829	0.74851	0.92453	0.758102	0.914702	0.703205	0.645251
														0.805926	0.806045	0.802528	0.749875	0.877767	0.833712	0.610684	0.587893
														0.501145	0.778941	0.886067	0.922698	0.772725	0.830635	0.812519	0.860476
														0.799688	0.911422	0.784504	0.754667	0.832013	0.801733	0.773164	0.765921
														0.913702	0.880068	0.840199	0.857014	0.790847	0.779238	0.788223	0.58514
														0.814852	0.807503	0.502336	0.850495	0.786551	0.902283	0.53398	0.604622
														0.79202	0.892626	0.513071	0.874123	0.755516	0.857014	0.703458	0.545383
														0.629626	0.875019	0.633687	0.865789	0.750009	0.859172	0.827978	0.808391
														0.7716	0.901161	0.713238	0.792681	0.754656	0.851707	0.777461	0.789055
														0.777603	0.801574	0.818693	0.759095	0.535173	0.890699	0.882925	0.842815
														0.628825	0.8135	0.816205	0.76671	0.775592	0.721532	0.80023	0.915945
														0.840828	0.893526	0.817798	0.882581	0.753652	0.896878	0.814504	0.878029
														0.483042	0.82729	0.894786	0.777591	0.792347	0.820095	0.878478	0.845435
														0.756635	0.809194	0.646418	0.830919	0.6096	0.838681	0.80528	0.723148
														0.901564	0.824177	0.776481	0.807827	0.754345	0.777309	0.813651	0.891315
														0.868879	0.880946	0.778171	0.865196	0.652921	0.830556	0.697498	0.873926
															0.783298	0.783423	0.846398	0.851561	0.873046	0.79539	0.876117
															0.928132	0.788801	0.74157	0.600119	0.85722	0.807396	0.855852
															0.804565	0.586676	0.862176	0.777658	0.805016	0.84045	0.841941
															0.87944	0.522605	0.908397	0.767366	0.857599	0.83971	0.871938
															0.88286	0.773809	0.803636	0.78443	0.814738	0.755332	0.86605
															0.76483	0.663217	0.856908	0.766548	0.826529	0.728347	0.886197
															0.819662	0.73594	0.855434	0.781995	0.655994	0.852033	0.851802
															0.776865	0.78493	0.838393	0.681492	0.872062	0.598074	0.655459
															0.793435	0.663576	0.843454	0.864828	0.866856	0.838294	0.802444
															0.79704	0.808698	0.784627	0.838348	0.84	0.838426	0.862286
															0.754826	0.793419	0.882657	0.81112	0.872583	0.650067	0.85952
															0.748979	0.614347	0.821926	0.566458	0.909829	0.554332	0.822036
															0.801805	0.821273	0.806622	0.568709	0.795417	0.582531	0.856068
															0.858146	0.757862	0.824407	0.738619	0.857758	0.823394	0.873224
															0.924488	0.73683	0.832587	0.822651	0.815605	0.792349	0.865522
															0.79187	0.742237	0.918747	0.751669	0.833409	0.838416	0.9118
															0.831277	0.642805	0.896668	0.785027	0.829932	0.826874	0.842628
															0.801868	0.8184	0.765842	0.833754	0.887835	0.59533	0.899607
															0.892791	0.751966	0.842045	0.755206	0.936537	0.802277	0.791916
															0.799882	0.60229	0.837098	0.766385	0.890493	0.784395	0.913582
															0.83906	0.762005	0.827187	0.797295	0.930631	0.845757	0.64782
															0.826691	0.758786	0.8509	0.725409	0.920115	0.810954	0.879325
															0.914847	0.785471	0.862984	0.682736	0.87332	0.760354	0.82407
															0.709795	0.786288	0.820316	0.597883	0.901351	0.767376	0.916882
															0.825365	0.825416	0.815637	0.784095	0.88207	0.766106	0.868896
															0.858588	0.853655	0.795551	0.783165	0.845008	0.865799	0.7429
															0.860404	0.766396	0.84239	0.657136	0.810409	0.810102	0.861411
															0.828417	0.796031	0.775442	0.910878	0.905418	0.829794	0.822498
															0.86504	0.657337	0.853783	0.760719	0.895851	0.655809	0.858614
															0.807719	0.673639	0.807464	0.582173	0.814546	0.769283	0.858487
															0.832167	0.757362	0.860184	0.8291	0.898363	0.774477	0.880774
															0.882958	0.543802	0.865467	0.79264	0.867857	0.803015	0.851307
															0.947285	0.840762	0.895824	0.779722	0.744765	0.609742	0.813023
															0.896003	0.886692	0.853607	0.705917	0.817307		0.853537
															0.646827	0.521544	0.831142	0.569732	0.664139		0.816878
															0.850924	0.731865	0.844297	0.578397	0.903041		0.910562
															0.846759	0.751797	0.848241	0.783948	0.780531		0.892836
															0.773462	0.67154	0.725024	0.78673	0.819373		0.902941
															0.741883	0.469319	0.904794	0.916729	0.824403		0.775329
															0.841107	0.805326	0.765586	0.865339	0.868962		0.89968
															0.871239	0.805755	0.927462	0.643058	0.831115		0.648304
															0.834362	0.814403	0.812171	0.879799	0.880604		0.895053
															0.82221	0.790561	0.845247	0.55968	0.846973		0.844395
															0.882097	0.797732	0.847291	0.821939	0.735443		0.884431
															0.775569	0.661393	0.873218	0.877465	0.849662		0.922785
															0.904889	0.473866	0.856639	0.720448	0.829544
															0.792064	0.868262	0.8912	0.833314	0.887095
															0.781248	0.565492	0.927435	0.796702	0.874569
															0.68363	0.751497	0.762691	0.674733	0.783564
															0.771769	0.715328	0.805616	0.66463	0.753132
															0.845205	0.77716	0.841806	0.877452	0.916254
															0.794286	0.445064	0.78083	0.853705	0.872129
															0.949584	0.75083	0.921919	0.858757	0.896105
															0.847941	0.592236	0.897678	0.780074	0.693073
															0.756023	0.613036	0.867669	0.850503	0.659472
															0.78083	0.642803	0.862132	0.673989	0.84772
															0.918685	0.774933	0.915116	0.744557	0.885144
															0.896732	0.533192	0.678319	0.599568	0.835373
															0.897437	0.729857	0.881692	0.767479	0.861962
															0.810494	0.531956	0.883121	0.869738	0.872383
															0.865879	0.416664	0.877483	0.789692	0.781028
															0.85624	0.767829	0.861728	0.53891	0.829369
															0.796884	0.761923	0.748788	0.777298	0.802394
															0.817009	0.712616	0.858038	0.787164	0.762659
															0.819495	0.83066	0.721469	0.610297	0.8597
															0.791219	0.828817	0.855084	0.859336	0.899223
															0.917173	0.824571	0.932352	0.568634	0.845511
															0.813117	0.913842	0.822185	0.790518	0.812776
															0.852564	0.674219	0.837617	0.782898	0.814974
															0.786882	0.863389	0.820324	0.775413	0.860113
																0.775984	0.899369	0.799062	0.783317
																0.827118		0.719634	0.649
																0.796022		0.849827	0.845535
																0.624478		0.648265	0.771085
																0.804864		0.788006	0.893049
																0.826077		0.64673	0.881196
																0.718749		0.903794	0.836204
																0.720125		0.777901	0.873862
																0.595398		0.755168	0.848473
																0.855199		0.905804	0.79343
																0.674138		0.831194	0.773509
																0.686707		0.537266	0.860597
																0.753673		0.755076	0.926278
																0.574769		0.627638	0.80674
																0.653149		0.897301	0.748517
																0.846696		0.822751	0.790504
																0.813016		0.771636	0.916862
																0.770834		0.552936	0.886178
																0.762392		0.669102	0.819861
																0.771431		0.845387	0.850743
																0.833777		0.78542	0.835031
																0.66081		0.772975	0.747462
																0.633276		0.844549	0.802192
																0.864768		0.82391	0.811552
																0.656094		0.895975	0.938798
																0.637535		0.838418	0.756623
																0.529976		0.579916	0.835164
																0.814342		0.823407	0.822758
																0.815378		0.886185	0.8543
																0.77589		0.672533	0.848078
																0.800506		0.647286	0.874988
																0.611309		0.874702	0.808649
																0.702091		0.816027	0.821866
																0.809606		0.848526	0.895232
																0.678191		0.774584	0.831335
																0.762595		0.890053	0.922931
																0.86111		0.792279	0.854148
																0.639957		0.775685	0.86536
																0.58955		0.868059	0.832926
																0.759015		0.81919	0.910061
																0.810634		0.769177	0.839339
																0.812567		0.688112	0.82588
																0.513544		0.832307	0.785923
																0.869694		0.610693	0.868465
																0.844011		0.631389	0.924426
																0.753976		0.833577	0.898092
																0.856919		0.636864	0.932293
																0.856735		0.602346	0.816507
																0.784012		0.572546	0.899949
																0.677526		0.724905	0.805637
																0.82917		0.754993	0.902387
																0.835633		0.747506	0.803267
																0.790333		0.857879	0.876382
																0.595614		0.713169	0.6973
																0.502296		0.545385	0.817169
																0.514192		0.62726
																0.758884		0.495623
																0.819214		0.724424
																0.614099		0.711613
																0.642651		0.565057
																0.651752		0.641868
																0.517628		0.686927
																0.628256		0.872587
																0.876457		0.787691
																0.739605		0.810647
																0.778898		0.552955
																0.627945		0.458446
																0.527863		0.809836
																0.640659		0.7571
																0.593967		0.680824
																0.902378		0.88381
																0.519666		0.809836
																0.440274		0.68021
																0.899953		0.835425
																0.695696		0.864097
																0.605129		0.884256
																0.643321		0.780432
																0.723517		0.558933
																0.539379		0.567358
																0.534116		0.830448
																0.590251		0.775756
																0.626509		0.810048
																0.606872		0.822392
																0.820749		0.667843
																0.508624		0.891864
																0.772094		0.582092
																0.743229		0.809836
																0.819952		0.778138
																0.773971		0.653088
																0.658181		0.854693
																0.760628		0.837105
																		0.711738
																		0.575654
																		0.843476
																		0.816027
																		0.810571
																		0.633787
																		0.515298
																		0.811089
																		0.758925
																		0.815265
																		0.638182
																		0.504345
																		0.858979
																		0.77467
																		0.731686
																		0.729263
																		0.833581
																		0.521735
																		0.745889
																		0.567413
																		0.612277
																		0.414223
																		0.755721
																		0.492572
																		0.545646
																		0.610007
																		0.455823
																		0.760969
																		0.777389
																		0.544384
																		0.775144
																		0.648387
																		0.731669
																		0.72428
																		0.781969
																		0.800263
																		0.601451
																		0.455251
																		0.714366
																		0.623602
																		0.785315
																		0.800284
																		0.721605
																		0.372744
																		0.670554
																		0.77463
																		0.848074
																		0.721883
																		0.565665
																		0.475531
																		0.793313
																		0.591713
																		0.56816
																		0.770396
																		0.599596
																		0.671236
																		0.815724
																		0.585696
																		0.554529
																		0.51594
																		0.815026
																		0.799141
																		0.722382
																		0.83396
																		0.863137
																		0.742156
																		0.551026
																		0.82322
																		0.604358
