# Supplementary material for: Hair follicle dermal condensation forms via Fgf20 primed cell cycle exit, cell motility, and aggregation
Source: eLife. 2018 Jul 31;7:e36468. doi: 10.7554/eLife.36468 (PMC6107334; doi:10.7554/eLife.36468)
Supplement: Figure 2—figure supplement 1—source data 1. — Values used in quantification of percent Sox2+ cells also positive for tdTomato (Figure 2—figure supplement 1D). [file elife-36468-fig2-figsupp1-data1.xlsx]

## Sheet: Figure 2--figure supplement
Figure 2--figure supplement 1D
E13.5 -> E15.5	E14.5 -> E15.5
4.44	12
0	15.15
0	0
19.05	0
0	0
0	18.18
0	0
19.35	27.78
	2.56
	40.91
