# Supplementary material for: Hair follicle dermal condensation forms via Fgf20 primed cell cycle exit, cell motility, and aggregation
Source: eLife. 2018 Jul 31;7:e36468. doi: 10.7554/eLife.36468 (PMC6107334; doi:10.7554/eLife.36468)
Supplement: Figure 2—source data 1. — Values for quantification of percent of Sox2+ cells labeled with tdTomato (Figure 2G). Values for quantification of numbers of Sox2+ cells and tdTomato+,Sox2+ cells (Figure 2H). Values for quantification of distance of tdTomato+,Sox2+ and tdTomato-,Sox2+ cells to center of placode surface adjacent to DC at E14.5-> E15.5 (Figure 2I). Values for quantification of nearest neighbor of tdTomato+,Sox2+ cells in E14.5- > E15.5 (Figure 2J). [file elife-36468-fig2-data1.xlsx]

## Sheet: Figure 2 
Figure 2G						Figure 2H											Figure 2I			Figure 2J
E12.5 -> E13.5	E12.5 -> E14.5	E13.5 -> E14.5	E13.5 -> E15.5	E14.5 -> E15.5		E12.5 -> E13.5		E12.5 -> E14.5		E13.5 -> E14.5		E13.5 -> E15.5		E14.5 -> E15.5			tdTomato+	tdTomato-		Cell type	tdTom+ neighbour	Tom- neighbour
0	3.7	5.88	49.12	56.36		tdTomato+	Sox2+	tdTomato+	Sox2+	tdTomato+	Sox2+	tdTomato+	Sox2+	tdTomato+	Sox2+		36.6541	43.7432		tdTomato +	557	78
0	7.46	8.7	39.58	88.76		0	7	2	54	5	85	28	57	31	55		21.7143	27.7958		Tomato -	131	158
0	18.75	4.05	70	79.66		0	14	5	67	6	69	19	48	79	89		25.8903	29.1716
23.08	14.52	1.67	64.52	75.29		0	1	12	64	3	74	35	50	47	59		16.8498	25.0921
0	5.88	14.77	30.51	64.56		3	13	9	62	1	60	40	62	64	85		22.0831	29.1217
9.09	24.59	8.45	40.24	75.28		0	10	3	51	13	88	18	59	51	79		19.9727	27.7946
6.67	12.5	16.9	72.41	64.52		2	22	15	61	6	71	33	82	67	89		19.5052	22.1003
8.33	6.06	3.45	50	59.77		2	30	8	64	12	71	42	58	60	93		19.2869	24.713
7.14	0	7.41	54.29	71.28		1	12	4	66	2	58	25	50	52	87		18.5271	24.0206
5.88	2.56	2.67	78.38	76.62		1	14	0	34	4	54	38	70	67	94		17.4266	25.5541
0	0	8.47	59.62	66.67		4	68	1	39	2	75	58	74	59	77		19.0288	38.3073
4	1.67	0	50.62	62.32		0	28	0	57	5	59	31	52	58	87
0	12.31	30.12	20	66.28		2	50	1	60	0	46	41	81	43	69
4.35	16.67	1.23	29.82	68.67		0	56	8	65	25	83	10	50	57	86
2.56	21.74	4.65	44.44	60.53		2	46	15	90	1	81	17	57	57	83
0	0	12.99	55.68	55.56		1	39	15	69	2	43	44	99	46	76
4.17	1.89	8.06	48.98	54.17		0	20	0	61	10	77	49	88	40	72
3.85	2.2	1.41	50	62.32		2	48	1	53	5	62	48	98	39	72
8.2	0	0	40.79	50.51		2	52	2	91	1	71	47	94	43	69
12.3	2.94	0	51.04	56.84		5	61	0	66	0	61	31	76	50	99
0	1.14	43.75	66.33	51.52		8	65	2	68	0	74	49	96	54	95
2.04	14.29	45.07	51.4			0	12	1	88	21	48	65	98	51	99
2.56	5.75	7.89	70.51			1	49	13	91	32	71	55	107
		36.36				1	39	5	87	3	38	55	78
		26.83								24	66
		37.5								22	82
		64.71								24	64
		39.66								44	68
		60								23	58
		63.24								39	65
		58.11								43	68
		45.07								43	74
		8.47								32	71
										5	59
