# Supplementary material for: Hair follicle dermal condensation forms via Fgf20 primed cell cycle exit, cell motility, and aggregation
Source: eLife. 2018 Jul 31;7:e36468. doi: 10.7554/eLife.36468 (PMC6107334; doi:10.7554/eLife.36468)
Supplement: Figure 3—source data 1. — Values for quantification of percent DC cells and IF cells during DC morphogenesis (stages I, II, III, and IV) in Fgf20+/-, E15.5 Fgf20+/-, E14.5 Fgf20-/-, and K14-Eda (Figure 3B), and EdU incorporation (Figure 3G). [file elife-36468-fig3-data1.xlsx]

## Sheet: Figure 3 
Figure 3B																																													Figure 3G
I								II								III								IV								Fgf20-/-				K14-Eda				E15.5					Stage	I	II	III	IV
IF				DC				IF				DC				IF				DC				IF				DC				DC				DC				DC					% EdU+	25	0	6.52174	3.63636
FucciR	Both	FucciG	Neither	FucciR	Both	FucciG	Neither	FucciR	Both	FucciG	Neither	FucciR	Both	FucciG	Neither	FucciR	Both	FucciG	Neither	FucciR	Both	FucciG	Neither	FucciR	Both	FucciG	Neither	FucciR	Both	FucciG	Neither	FucciR	Both	FucciG	Neither	FucciR	Both	FucciG	Neither	FucciR	Both	FucciG	Neither			0	0	2.22222	0
15.6863	1.96078	23.5294	58.8235	100	0	0	0	52.2727	0	20.4545	27.2727	65.5172	0	10.3448	24.1379	8.88889	6.66667	24.4444	60	65	0	15	20	9.21053	2.63158	43.4211	50	95	1.25	0	3.75	22.7848	0	16.4557	60.7595	87.3096	0.507614	1.52284	10.6599	88.5714	4.28571	2.85714	4.28571			21.0526	10.7143	1.92308	5.88235
25	0	27.2727	47.7273	42.8571	0	35.7143	21.4286	38.8889	0	27.7778	33.3333	75	0	25	0	26.9231	0	15.3846	57.6923	73	2.7	5.4	18.9	6.45161	0	29.0323	64.5161	86.9565	2.17391	0	10.8696	29.7297	0	25.6757	44.5946	85.1562	1.5625	4.16667	9.11458	94.7368	0	1.75439	3.50877			22.7273	0	0	5.61798
25.3968	0	23.8095	50.7937	66.6667	0	22.2222	11.1111	27.2727	1.81818	40	30.9091	91.1765	0	2.94118	5.88235	36.5385	1.92308	17.3077	44.2308	72.4	0	13.8	13.8	13.7255	0	27.451	58.8235	93.6508	4.7619	0	1.5873	37.7778	0	33.3333	28.8889	86.1446	3.01205	3.61446	7.22892	84.2105	12.2807	1.75439	1.75439			15.3846	3.57143	0	2.43902
12.1951	0	19.5122	68.2927	50	0	33.3333	16.6667	36	0	16	48	73.0769	0	15.3846	11.5385	23.5849	4.71698	38.6792	33.0189	79.4	0	5.9	14.7	26.5625	6.25	7.8125	59.375	78.75	12.5	1.25	7.5	18.2482	5.83942	21.1679	66.4234	85.2041	0.510204	0.510204	13.7755	86.6667	0	1.33333	12			31.8182	0	0	2.7027
62.963	0	16.0494	20.9877	63.6364	0	18.1818	18.1818	29.1667	1.38889	29.1667	40.2778	87.5	0	12.5	0	29.6296	3.7037	22.2222	44.4444	72.4	0	13.8	13.5	23.4043	0	29.078	47.5177	89.7727	0	4.54545	5.68182	14.1791	0	20.1493	65.6716	86.7742	0	2.90323	10.3226	89.7059	0	2.94118	7.35294			27.7778	14.2857	0	0
14.0845	4.22535	19.7183	61.9718	42.8571	0	28.5714	28.5714	4.7619	4.7619	20.6349	69.8413	76.1905	0	23.8095	0	44.0678	23.7288	16.9492	15.2542	89.1	0	10.9	0	13.6364	2.27273	17.0455	67.0455	74.6032	3.1746	17.4603	4.7619	24.0964	6.0241	13.253	56.6265	81.0056	0.558659	0.558659	17.8771	82.8571	2.85714	5.71429	8.57143			20	10.3448	5.17241	5.55556
19.6721	1.63934	13.1148	65.5738	33.3333	0	0	66.6667	21.3333	6.66667	26.6667	45.3333	77.2727	0	2.27273	20.4545	12.766	23.4043	38.2979	25.5319	92.3	0	5.8	1.9	28.7879	1.51515	18.1818	51.5152	79.7297	1.35135	5.40541	13.5135	46.6102	9.32203	33.0508	29.661					83.1169	9.09091	0	7.79221			25	10	12.069	9.23077
24.2857	0	17.1429	58.5714	33.3333	0	53.3333	13.3333	23.4043	6.38298	40.4255	29.7872	64.7059	0	14.7059	20.5882	15.9091	0	20.4545	63.6364	75	3.1	6.3	15.6	19.7531	3.7037	16.0494	60.4938	73	12	0	15									87.037	1.85185	0.925926	10.1852			0	3.33333	0	5
																																								70	0.909091	2.72727	26.3636			9.52381			0
