# Supplementary material for: Hair follicle dermal condensation forms via Fgf20 primed cell cycle exit, cell motility, and aggregation
Source: eLife. 2018 Jul 31;7:e36468. doi: 10.7554/eLife.36468 (PMC6107334; doi:10.7554/eLife.36468)
Supplement: Figure 4—figure supplement 1—source data 1. — Values used to quantify the escape angle (Figure 4—figure supplement 1A), track straightness (Figure 4—figure supplement 1B), and net velocity (Figure 4—figure supplement 1C) of Sox2+ cells before entry into the DC and the IF fibroblasts. [file elife-36468-fig4-figsupp1-data1.xlsx]

## Sheet: Figure 4--figure supplement 
					Figure 4--figure supplement 1A	Figure 4--figure supplement 1B	Figure 4--figure supplement 1C
Skin	Fibroblast type	Placode	Cell ID	T0 distance from DC center (um)	Escape angle	Straightness	Net velocity (um/s)
A	IF	NA	1000000000	30.6602	25.9362	0.323394	0.000752316
A	IF	NA	1000000001	22.4041	6.67884	0.214765	0.000485239
A	IF	NA	1000000002	22.3982	72.8553	0.293975	0.000630458
A	IF	NA	1000000003	18.7627	88.8492	0.140134	0.000296363
A	IF	NA	1000000004	19.6286	156.418	0.149142	0.000488118
A	IF	NA	1000000005	50.2672	144.311	0.222058	0.000400678
A	IF	NA	1000000006	16.7015	157.099	0.111946	0.000222597
A	IF	NA	1000000007	23.3928	30.8628	0.158914	0.00033244
A	IF	NA	1000000008	33.5432	9.54766	0.174499	0.000424974
A	IF	NA	1000000009	18.5069	81.8602	0.159256	0.000334657
A	IF	NA	1000000010	18.6145	30.2717	0.247828	0.000442371
A	IF	NA	1000000011	23.3604	151.577	0.269183	0.000642413
A	IF	NA	1000000012	30.1748	94.0098	0.297517	0.000503025
A	IF	NA	1000000013	29.0028	126.705	0.282563	0.000609264
A	IF	NA	1000000014	30.0215	101.522	0.106703	0.000207711
A	IF	NA	1000000015	26.1103	55.8054	0.281617	0.000438261
A	IF	NA	1000000016	30.2093	34.7028	0.17427	0.000530568
A	DC	1	1000000000	41.126	5.0945	0.379981	0.000874529
A	DC	1	1000000001	32.9889	17.0301	0.203095	0.000489377
A	DC	1	1000000002	26.9791	60.4789	0.238473	0.000568083
A	DC	1	1000000003	37.4588	23.1881	0.257866	0.000590556
A	DC	1	1000000004	32.0886	72.3824	0.269551	0.000464824
A	DC	1	1000000005	29.5476	26.177	0.304269	0.000535882
A	DC	1	1000000006	26.9417	130.138	0.14916	0.00032519
A	DC	2	1000000000	25.9783524206213	122.095641638895	0.157256	0.000259552
A	DC	2	1000000001	24.3375823838359	24.9238434551562	0.206521	0.000507144
A	DC	2	1000000002	31.0699509166011	103.608786383268	0.145092	0.000319685
A	DC	2	1000000003	31.7008502486921	106.235068316513	0.0742107	0.000179997
A	DC	2	1000000004	29.3431660086296	17.1383885425096	0.131082	0.000377212
A	DC	2	1000000005	30.6070058386965	3.95123332485426	0.214394	0.000372586
A	DC	2	1000000006	28.6246482991495	37.9039264846178	0.258152	0.00056342
A	DC	2	1000000007	19.8015814595931	41.2287309696747	0.0867281	0.000202944
A	DC	2	1000000008	44.2167397541926	12.8586248273602	0.205419	0.00083277
A	DC	2	1000000009	22.0989494431296	30.2983616743811	0.478594	0.00104594
B	DC	1	1000000000	19.5265	54.3661	0.228272	0.000360046
B	DC	1	1000000001	15.8276	17.7631	0.651182	0.000848167
B	DC	1	1000000002	24.9161	23.6221	0.484044	0.000705864
B	DC	1	1000000003	28.9545	43.1404	0.530346	0.000330661
B	DC	1	1000000004	19.7051	28.4898	0.281888	0.000374878
B	DC	1	1000000005	22.4043	55.3402	0.137307	0.000316495
B	DC	1	1000000006	25.6132	162.02	0.737298	0.00178352
B	DC	1	1000000007	27.6864	29.9755	0.640714	0.00110548
B	IF	NA	1000000000	20.1464	111.815	0.425845	0.00044008
B	IF	NA	1000000001	28.6353	82.4279	0.333187	0.000351252
B	IF	NA	1000000002	44.8333	59.507	0.114477	0.000161881
B	IF	NA	1000000003	34.5905	174.824	0.0873244	0.000128692
B	IF	NA	1000000004	28.0094	116.615	0.183134	0.00027472
B	IF	NA	1000000005	31.9394	80.2181	0.221636	0.000229781
B	IF	NA	1000000006	32.9789	29.4967	0.085272	0.000149545
B	IF	NA	1000000007	34.4405	97.8451	0.0642461	8.40001e-05
B	IF	NA	1000000008	17.4418	164.444	0.179342	0.000272306
B	IF	NA	1000000009	20.3416	72.3447	0.140848	0.000202899
B	IF	NA	1000000010	25.673	38.4935	0.136464	0.000178203
B	IF	NA	1000000011	39.0143	149.597	0.133053	0.000258655
B	IF	NA	1000000012	35.0436	37.4116	0.353318	0.000520013
B	IF	NA	1000000013	38.0765	38.337	0.0844662	0.000200851
B	IF	NA	1000000014	37.6138	46.2704	0.222011	0.000265693
B	IF	NA	1000000015	48.1162	65.6663	0.290642	0.000388104
B	IF	NA	1000000016	8.64751	57.747	0.376663	0.000318463
C	DC	1	1000000000	42.4626	18.2357	0.184201	0.000405048
C	DC	1	1000000001	36.2534	15.0937	0.0308787	7.91261e-05
C	DC	1	1000000002	18.8872	24.6418	0.0817392	0.000153079
C	DC	1	1000000003	23.0825	119.847	0.141708	0.000295682
C	DC	1	1000000004	28.4157	33.7896	0.0889495	0.000270729
C	DC	1	1000000005	25.8846	12.2053	0.0900756	0.000250475
C	DC	1	1000000006	39.003	0.0851145	0.119313	0.000262753
C	DC	1	1000000007	27.9759	31.6677	0.251715	0.000519583
C	DC	1	1000000008	19.1513	126.867	0.105032	0.000211478
C	DC	1	1000000009	32.9281	30.2204	0.0670994	0.000147884
C	DC	1	1000000010	26.5851	19.4019	0.107023	0.000224149
C	DC	1	1000000011	35.1585	49.6041	0.106242	0.000347719
C	DC	1	1000000012	26.8794	34.0119	0.352783	0.000733051
C	DC	1	1000000013	26.8843	56.0462	0.164928	0.00033115
C	DC	1	1000000014	26.7948	50.4258	0.162585	0.000431134
C	DC	1	1000000015	40.274	20.9338	0.147248	0.000267598
C	DC	1	1000000016	31.1878	5.04367	0.134841	0.000344536
C	DC	1	1000000017	40.1366	1.65177	0.157625	0.000380381
C	DC	1	1000000018	40.2841	24.8787	0.226311	0.000492725
C	DC	1	1000000019	20.5463	26.6986	0.265363	0.000655371
C	IF	NA	1000000000	22.1259	125.382	0.0373458	0.000116323
C	IF	NA	1000000001	49.8729	174.292	0.118615	0.000278954
C	IF	NA	1000000002	62.0872	44.4909	0.14374	0.000333587
C	IF	NA	1000000003	19.6275	52.3779	0.122842	0.000237682
C	IF	NA	1000000004	36.5229	7.58003	0.213602	0.000268867
C	IF	NA	1000000005	24.5062	135.658	0.0851087	0.000213359
C	IF	NA	1000000006	52.6103	38.9994	0.0953401	0.00029824
C	IF	NA	1000000007	27.8871	39.0568	0.0512315	0.000139911
C	IF	NA	1000000008	40.6374	88.7271	0.163551	0.000348036
C	IF	NA	1000000009	48.8429	114.202	0.121122	0.000270987
C	IF	NA	1000000010	17.1204	28.8595	0.095104	0.000240533
C	IF	NA	1000000011	27.845	137.792	0.200243	0.000370066
C	IF	NA	1000000012	15.2642	117.041	0.0807124	0.000217418
C	IF	NA	1000000013	23.8039	109.15	0.0831973	0.000229106
C	IF	NA	1000000014	49.5856	87.5235	0.117998	0.0002904
C	IF	NA	1000000015	83.1527	49.9832	0.205762	0.000470247
C	IF	NA	1000000016	53.9915	68.2617	0.139556	0.000474087
C	IF	NA	1000000017	10.9329	7.24606	0.114175	0.000318435
C	IF	NA	1000000018	56.9582	98.2295	0.173721	0.000347638
C	IF	NA	1000000019	41.1614	82.5231	0.298273	0.000742495
C	IF	NA	1000000020	9.55784	41.426	0.057776	0.000153096
E	IF	NA	1000000000	10.4881	147.005	0.0658417	0.000147932
E	IF	NA	1000000001	30.0269	108.701	0.197255	0.000598595
E	IF	NA	1000000002	13.2422	1.46353	0.516875	0.00150145
E	IF	NA	1000000003	32.9376	14.9449	0.227567	0.000572109
E	IF	NA	1000000004	56.1704	27.1878	0.42797	0.00153915
E	IF	NA	1000000005	17.0926	69.5738	0.224117	0.000579598
E	IF	NA	1000000006	26.6864	89.3109	0.0932564	0.000194775
E	IF	NA	1000000007	44.7781	48.3955	0.457225	0.00174272
E	IF	NA	1000000008	28.3887	51.7396	0.277226	0.000680997
E	IF	NA	1000000009	33.9724	9.39716	0.41125	0.00169634
E	IF	NA	1000000010	28.151	5.67688	0.301157	0.000913971
E	IF	NA	1000000011	41.74	30.6901	0.299662	0.000985163
E	IF	NA	1000000012	41.8228	15.6031	0.374544	0.000881116
E	IF	NA	1000000013	34.2904	12.0201	0.187733	0.000522658
E	IF	NA	1000000014	25.9205	105.903	0.239559	0.00079668
E	IF	NA	1000000015	46.1743	57.4679	0.411607	0.000822636
E	IF	NA	1000000016	38.6997	77.8798	0.281047	0.000753108
E	IF	NA	1000000017	29.0206	6.94669	0.518887	0.000892618
E	IF	NA	1000000018	58.8338	65.3938	0.28285	0.000610834
E	DC	1	1000000000	37.365	27.2661	0.43637	0.00129748
E	DC	1	1000000001	25.7964	44.6905	0.82586	0.00203618
E	DC	1	1000000002	29.0848	53.9248	0.493266	0.000844165
E	DC	1	1000000003	39.036	30.6273	0.619042	0.00146996
E	DC	1	1000000004	45.2951	13.9074	0.605468	0.00104524
E	DC	1	1000000005	19.7847	97.5748	0.515577	0.00116197
E	DC	1	1000000006	16.9796	175.688	0.407346	0.000687869
E	DC	1	1000000007	45.6595	0.380988	0.848556	0.00220728
E	DC	2	1000000000	33.0233	7.97861	0.398983	0.00100388
E	DC	2	1000000001	27.9957	48.8819	0.460662	0.000926698
E	DC	2	1000000002	30.3724	53.56	0.251224	0.000490083
E	DC	2	1000000003	25.4692	65.926	0.390858	0.000679926
E	DC	2	1000000004	19.4682	128.932	0.412546	0.000573425
E	DC	2	1000000005	33.3795	21.7674	0.296306	0.000798137
D	DC	1	1000000000	31.2277	37.0228	0.526729	0.000643368
D	DC	1	1000000001	25.8463	28.2246	0.763893	0.000934445
D	DC	1	1000000002	28.427	26.0198	0.622204	0.000773123
D	DC	1	1000000003	22.6922	42.8198	0.827533	0.00064409
D	IF	NA	1000000000	76.7632	85.3753	0.302872	0.000405999
D	IF	NA	1000000001	64.6295	54.2543	0.24569	0.000285064
D	IF	NA	1000000002	79.3579	5.82695	0.266216	0.000312606
D	IF	NA	1000000003	67.471	25.8214	0.176426	0.000219247
D	IF	NA	1000000004	48.2054	152.113	0.132346	0.000209086
D	IF	NA	1000000005	68.9293	50.9996	0.230034	0.000234494
D	IF	NA	1000000006	66.766	159.664	0.331624	0.000397534
D	IF	NA	1000000007	38.6933	75.2763	0.238363	0.000438746
D	IF	NA	1000000008	59.2522	128.482	0.26221	0.0005145
D	IF	NA	1000000009	79.0149	88.701	0.253647	0.000468332
D	IF	NA	1000000010	104.347	172.623	0.264833	0.000319026
D	IF	NA	1000000011	80.2564	153.872	0.33729	0.000484538
D	IF	NA	1000000012	15.7541	40.155	0.150805	0.000225293
D	IF	NA	1000000013	36.1413	13.8949	0.069061	0.000103155
F	IF	NA	1000000000	40.8808	120.544	0.421803	0.00125694
F	IF	NA	1000000001	65.6108	22.1767	0.0724461	0.000201549
F	IF	NA	1000000002	82.8455	48.3572	0.143213	0.000468989
F	IF	NA	1000000003	83.7077	64.576	0.233879	0.000280453
F	IF	NA	1000000004	39.5605	4.0431	0.172568	0.000228736
F	IF	NA	1000000005	71.7744	2.77877	0.424963	0.000760477
F	IF	NA	1000000006	103.926	76.0856	0.32437	0.000454573
F	IF	NA	1000000007	124.131	88.0997	0.263104	0.000350296
F	IF	NA	1000000008	53.3712	57.8472	0.209923	0.000325123
F	DC	1	1000000000	17.8665	9.05421	0.0960065	0.000300856
F	DC	1	1000000001	24.5721	40.1926	0.185138	0.000554032
F	DC	1	1000000002	38.8873	13.7818	0.368184	0.0011039
F	DC	1	1000000003	15.2616	23.3829	0.181848	0.000548119
F	DC	1	1000000004	19.822	15.0463	0.0788743	0.000224599
F	DC	1	1000000005	29.2754	1.23409	0.192592	0.000452355
F	DC	1	1000000006	18.9723	1.96088	0.346579	0.000721147
F	DC	1	1000000007	11.2457	59.9466	0.534752	0.00105349
F	DC	1	1000000008	12.997	45.5932	0.221567	0.000580193
F	DC	2	1000000000	45.0611	4.71034	0.231786	0.000579286
F	DC	2	1000000001	40.3495	6.61186	0.292726	0.000676026
F	DC	2	1000000002	43.7393	34.7438	0.553308	0.0012154
F	DC	3	1000000000	34.1502	8.9593	0.253894	0.000514867
F	DC	3	1000000001	15.4591	1.28255	0.123553	0.000216457
F	DC	3	1000000002	17.6197	5.88678	0.206388	0.000564595
F	DC	3	1000000003	18.7303	10.7402	0.109828	0.000277117
F	DC	3	1000000004	34.5243	6.14675	0.201242	0.000447734
