# Supplementary material for: Hair follicle dermal condensation forms via Fgf20 primed cell cycle exit, cell motility, and aggregation
Source: eLife. 2018 Jul 31;7:e36468. doi: 10.7554/eLife.36468 (PMC6107334; doi:10.7554/eLife.36468)
Supplement: Figure 4—figure supplement 2—source data 1. — Values used to quantify the phalloidin intensity between the Sox2-GFP+ cells found in the DC and outside the DC as well as the Sox2-GFP- interfollicular fibroblasts (Figure 4—figure supplement 2B). Values used to quantify the phalloidin intensity between the DCs during DC morphogenesis (Figure 4—figure supplement 2D). [file elife-36468-fig4-figsupp2-data1.xlsx]

## Sheet: Figure 4 - figure supplement 2
Figure 4--figure supplement 2B					Figure 4--figure supplement 2D
Sox2-GFP+		Sox2-GFP-			I	II	III	IV
DC	non-DC	IF			1.26143	1.52949	1.75269	2.32839
14379.4	10094.2	8541.6			1.30875	1.98027	2.10432	2.74631
16116.2	11956.3	8621.41			1.28502	1.30401	1.63976	1.41491
9192.43	10622	7868.54			1.35909	1.5063	1.58029	2.46416
18492.2	17215.5	8483.26			1.51325	1.63324	1.74716	2.51634
16379.1	12406.4	11372.2			1.56139	1.6298	1.42506	1.86949
11720.8	12800	8392.8				1.44495		1.77642
7065.08	10594.6	7858.17				1.62272		1.63154
9903.43	10859.5	9822.51						2.24011
14063.7	12914	9566.9
10219.8	13725.4	14230.3
18305.6	14282	9456.99
7417.65	12175.3	12612
8679.58	11474.2	9993.82
14958.1	9666.54	7749.88
18433.2	9067.36	6257.53
9615.6	8105.82	7461.58
13369.9	7981.92	10307.2
17471.1	8841.49	9144.41
14149.7	9070.39	7421
19056.4	8517.61	9304.89
12752.9	5930.14	6229.67
12722.4	7707.08	5870.51
10976.3	7928.2	4536.67
10689.3	13486.8	9422.89
7169.96	11971.9	8181.01
9813.89	7810.03	10366.9
11314.8	8948.25	6665.79
10361.6	12696.5	11023.7
9715.88	12932.7	8238.09
7898.21	8842.34	11713
10026.7	12165.9	9539.09
9689.89	12360	8303.94
8132.85	13934.9	13411.1
10851.7	12180.7	10742.7
8988.64	9749.57	9247.94
8376.63	12360.4	12481.4
8816	7786.68	7885.53
8481.4	6822.31	6945.42
7529.55	6742.42	6887.28
7972.91	8644.75	6379.92
8489.61	6863.67	7518.95
7467.79	6115.02	9435.37
8058.54	5877.11	6913.49
18510	4904.78	5891.48
15970.3	7670.37	6722.64
14515	8446.78	6409.11
6636.9	7250.86	6237.71
7660.81	8174.73	4326.88
6409.53	7415.79	6845.91
	8430.6	6847.44
	5609.81	6030.77
	5451.22	6448.34
	5744.61	5453.31
	7165.77	5267.62
	4151.03	6945.56
	7269.89	3657.23
	6456.19	4379.33
	7645.94	5625
	6490.24	5384.38
	8775.45	3954.39
	5818.68	7374.92
	5760.43	5073.35
	6845.61	6661.43
	7094.16	5020.99
	6423.69	5084.14
	10912.4	11846.3
	13804	12594.4
	9110.69	12675.3
	10204.3	9080.69
	14431.5	10954.9
	12298.5	9557.31
	6276.8	4659.61
	7844.52	4181.2
	6591.12	5456.49
	7892.57	4818.35
	5735.55	5434.93
