# Supplementary material for: Hair follicle dermal condensation forms via Fgf20 primed cell cycle exit, cell motility, and aggregation
Source: eLife. 2018 Jul 31;7:e36468. doi: 10.7554/eLife.36468 (PMC6107334; doi:10.7554/eLife.36468)
Supplement: Figure 4—source data 1. — Values used to quantify the escape angle (Figure 4C), velocity (Figure 4D), track straightness (Figure 4E), and net velocity (Figure 4F) for DC cells and IF fibroblasts. [file elife-36468-fig4-data1.xlsx]

## Sheet: Figure 4 
					Figure 4C	Figure 4D	Figure 4E	Figure 4F
Skin	Fibroblast type	Placode	Cell ID	T0 distance from DC center (um)	Escape angle	Velocity (um/s)	Straightness	Net velocity (um/s)
A	DC	1	1000000000	16.8744	1.32771	0.00190561	0.27684	0.000527548
A	DC	1	1000000001	20.6126	13.6559	0.00163623	0.226441	0.000370509
A	DC	1	1000000002	11.4855	122.533	0.00226531	0.140839	0.000319045
A	DC	1	1000000003	17.9789	102.323	0.00246918	0.0784174	0.000193626
A	DC	1	1000000004	18.5072	70.8321	0.00203826	0.309314	0.000630465
A	DC	1	1000000005	41.126	5.0945	0.0023015	0.379981	0.000874529
A	DC	1	1000000006	32.9889	17.0301	0.00240961	0.203095	0.000489377
A	DC	1	1000000007	26.9791	60.4789	0.00238216	0.238473	0.000568083
A	DC	1	1000000008	38.317	28.5529	0.00244858	0.0610493	0.000149484
A	DC	1	1000000009	37.4588	23.1881	0.00229016	0.257866	0.000590556
A	DC	1	1000000010	33.1536	121.309	0.00335127	0.0853729	0.000286108
A	DC	1	1000000011	23.0793	145.239	0.00220284	0.265901	0.000585737
A	DC	1	1000000012	32.0886	72.3824	0.00172444	0.269551	0.000464824
A	DC	1	1000000013	27.8955	159.917	0.00229566	0.239313	0.000549381
A	DC	1	1000000014	45.793	78.6387	0.00263509	0.305657	0.000805434
A	DC	1	1000000015	19.6373	172.934	0.00221593	0.22566	0.000500048
A	DC	1	1000000016	24.247	159.203	0.00188412	0.341326	0.000643101
A	DC	1	1000000017	29.5476	26.177	0.00176121	0.304269	0.000535882
A	DC	1	1000000018	33.4251	13.1679	0.00243429	0.3496	0.000851028
A	DC	1	1000000019	26.9417	130.138	0.00218014	0.14916	0.00032519
A	DC	1	1000000020	22.31	163.54	0.00245451	0.349062	0.000856779
A	DC	1	1000000021	42.0534	66.3428	0.00260239	0.104926	0.000273058
A	DC	1	1000000022	14.05	52.3598	0.00200182	0.125468	0.000251164
A	DC	2	1000000000	18.4648	170.288	0.00184988	0.0985616	0.000182328
A	DC	2	1000000001	28.1374	61.4731	0.00297442	0.032968	9.80608e-05
A	DC	2	1000000002	16.1	26.3943	0.00182467	0.13666	0.00024936
A	DC	2	1000000003	13.6327	28.3159	0.0023192	0.0935496	0.000216961
A	DC	2	1000000004	11.9788	72.4855	0.00203154	0.110585	0.000224658
A	DC	2	1000000005	9.07534	78.2492	0.0019296	0.298394	0.000575781
A	DC	2	1000000006	25.9557	85.346	0.00252198	0.137976	0.000347974
A	DC	2	1000000007	16.1765	15.2107	0.00278826	0.0361124	0.000100691
A	DC	2	1000000008	21.2941	84.7087	0.00170486	0.226272	0.000385762
A	DC	2	1000000009	23.6864	176.187	0.00206733	0.298675	0.000617463
A	DC	2	1000000010	25.9784	122.096	0.00165051	0.157256	0.000259552
A	DC	2	1000000011	24.3376	28.454	0.00222627	0.183601	0.000408747
A	DC	2	1000000012	31.07	103.609	0.00220333	0.145092	0.000319685
A	DC	2	1000000013	31.7009	106.235	0.00242549	0.0742107	0.000179997
A	DC	2	1000000014	29.3432	17.1384	0.00287768	0.131082	0.000377212
A	DC	2	1000000015	30.607	3.95123	0.00173786	0.214394	0.000372586
A	DC	2	1000000016	47.297	56.3033	0.00187005	0.156228	0.000292155
A	DC	2	1000000017	25.1145	96.1752	0.00171729	0.39079	0.0006711
A	DC	2	1000000018	28.6246	37.9039	0.0021825	0.258152	0.00056342
A	DC	2	1000000019	19.8016	41.2287	0.00234001	0.0867281	0.000202944
A	DC	2	1000000020	37.5169	66.7943	0.00295593	0.224212	0.000662756
A	DC	2	1000000021	44.2167	12.8586	0.00405401	0.205419	0.00083277
A	DC	2	1000000022	21.9155	56.3336	0.00184514	0.115914	0.000213879
A	DC	2	1000000023	22.0989	30.2984	0.00218545	0.478594	0.00104594
B	DC	1	1000000000	19.5265	54.3661	0.00157727	0.228272	0.000360046
B	DC	1	1000000001	15.8276	31.7281	0.00161539	0.47975	0.000774984
B	DC	1	1000000002	24.9161	40.3288	0.00155633	0.3811	0.000593119
B	DC	1	1000000003	28.9545	43.1404	0.000623482	0.530346	0.000330661
B	DC	1	1000000004	6.73564	0.352299	0.0013423	0.479024	0.000642993
B	DC	1	1000000005	19.7051	26.2817	0.00120993	0.5019	0.000607263
B	DC	1	1000000006	17.817	137.31	0.00125126	0.363194	0.000454449
B	DC	1	1000000007	27.5341	88.4556	0.00113778	0.250135	0.000284599
B	DC	1	1000000008	22.4043	55.3402	0.00230501	0.137307	0.000316495
B	DC	1	1000000009	25.6132	175.011	0.00226607	0.37144	0.000841706
B	DC	1	1000000010	27.6864	29.9755	0.00172539	0.640714	0.00110548
C	DC	1	1000000000	17.993	40.2667	0.00218835	0.25719	0.000562825
C	DC	1	1000000001	42.4626	18.2357	0.00219895	0.184201	0.000405048
C	DC	1	1000000002	17.8179	140.528	0.00260305	0.0967489	0.000251843
C	DC	1	1000000003	36.2534	15.0937	0.00256248	0.0308787	7.91261e-05
C	DC	1	1000000004	18.8872	38.8464	0.00190228	0.117846	0.000224178
C	DC	1	1000000005	23.0825	119.847	0.00208656	0.141708	0.000295682
C	DC	1	1000000006	28.4157	33.7896	0.00304363	0.0889495	0.000270729
C	DC	1	1000000007	31.6607	113.736	0.00212011	0.0869057	0.000184249
C	DC	1	1000000008	25.8846	12.2053	0.00278073	0.0900756	0.000250475
C	DC	1	1000000009	20.5806	29.6443	0.00232914	0.102432	0.000238578
C	DC	1	1000000010	15.9434	50.5054	0.00261008	0.104935	0.000273886
C	DC	1	1000000011	47.2891	39.8172	0.00295029	0.110267	0.000325322
C	DC	1	1000000012	10.3159	148.874	0.00251114	0.110615	0.00027777
C	DC	1	1000000013	12.955	26.1244	0.0019956	0.182453	0.000364103
C	DC	1	1000000014	35.021	63.3736	0.00228914	0.0492541	0.000112749
C	DC	1	1000000015	39.003	0.0851145	0.00220221	0.119313	0.000262753
C	DC	1	1000000016	21.7847	56.8457	0.00231689	0.196298	0.0004548
C	DC	1	1000000017	18.6187	12.9378	0.00206849	0.384815	0.000795987
C	DC	1	1000000018	27.9759	17.8302	0.00210468	0.173375	0.0003649
C	DC	1	1000000019	19.1513	126.867	0.00201346	0.105032	0.000211478
C	DC	1	1000000020	32.9281	30.2204	0.00220395	0.0670994	0.000147884
C	DC	1	1000000021	50.5269	1.79142	0.0024535	0.103394	0.000253676
C	DC	1	1000000022	46.0077	6.86085	0.00256467	0.0819403	0.00021015
C	DC	1	1000000023	26.5851	19.4019	0.0020944	0.107023	0.000224149
C	DC	1	1000000024	10.0612	54.2926	0.00277092	0.266733	0.000739093
C	DC	1	1000000025	14.2843	23.2631	0.00193807	0.235371	0.000456165
C	DC	1	1000000026	29.7544	96.2577	0.00202453	0.0898314	0.000181867
C	DC	1	1000000027	19.6645	112.673	0.00176652	0.209265	0.000369672
C	DC	1	1000000028	35.1585	49.6041	0.00321537	0.108143	0.000347719
C	DC	1	1000000029	26.8794	61.1934	0.00200067	0.0744291	0.000148908
C	DC	1	1000000030	26.8843	56.0462	0.00200786	0.164928	0.00033115
C	DC	1	1000000031	9.5644	116.458	0.0016558	0.0750436	0.000124257
C	DC	1	1000000032	26.7948	50.4258	0.00265175	0.162585	0.000431134
C	DC	1	1000000033	40.274	20.9338	0.00181733	0.147248	0.000267598
C	DC	1	1000000034	40.1725	14.5785	0.0021575	0.160318	0.000345887
C	DC	1	1000000035	35.6372	97.0638	0.00154109	0.0856326	0.000131967
C	DC	1	1000000036	25.6059	23.2206	0.00231832	0.176047	0.000408131
C	DC	1	1000000037	36.3379	31.4123	0.00207971	0.0580198	0.000120664
C	DC	1	1000000038	60.1102	27.0787	0.00279875	0.0769738	0.00021543
C	DC	1	1000000039	31.1878	5.04367	0.00255512	0.134841	0.000344536
C	DC	1	1000000040	5.37851	74.7345	0.00211829	0.0555951	0.000117767
C	DC	1	1000000041	24.3378	10.9946	0.00208399	0.0594272	0.000123846
C	DC	1	1000000042	40.1366	1.65177	0.00241321	0.157625	0.000380381
C	DC	1	1000000043	14.8152	12.0436	0.00219813	0.123556	0.000271592
C	DC	1	1000000044	12.7378	151.613	0.00213219	0.119248	0.000254257
C	DC	1	1000000045	40.2841	24.8787	0.00217721	0.226311	0.000492725
C	DC	1	1000000046	14.5475	11.3378	0.00206429	0.327787	0.000676647
C	DC	1	1000000047	12.9321	113.798	0.00310325	0.0967199	0.000300146
C	DC	1	1000000048	37.9779	163.03	0.00232214	0.430737	0.00100023
C	DC	1	1000000049	25.7599	4.04391	0.00266081	0.266078	0.000707984
C	DC	1	1000000050	22.4363	45.2994	0.00241852	0.334352	0.000808639
C	DC	1	1000000051	4.10564	148.904	0.0023841	0.233213	0.000556004
C	DC	1	1000000052	20.5463	26.6986	0.00246971	0.265363	0.000655371
E	DC	1	1000000000	11.7462	84.0926	0.00229194	0.343365	0.000786975
E	DC	1	1000000001	27.7668	4.28841	0.00164261	0.483172	0.000793664
E	DC	1	1000000002	24.3983	57.02	0.00168519	0.588485	0.00099171
E	DC	1	1000000003	9.03702	126.331	0.00167703	0.653836	0.0010965
E	DC	1	1000000004	37.365	18.7354	0.00278453	0.411339	0.00114538
E	DC	1	1000000005	28.8342	9.31496	0.00167625	0.677702	0.001136
E	DC	1	1000000006	17.5372	30.7889	0.00187396	0.479065	0.000897745
E	DC	1	1000000007	16.2308	7.01048	0.00206936	0.444412	0.000919645
E	DC	1	1000000008	17.9671	78.6288	0.00218768	0.238318	0.000521362
E	DC	1	1000000009	23.8571	43.2963	0.0014208	0.5245	0.000745208
E	DC	1	1000000010	25.7964	79.7658	0.00152898	0.51123	0.00078166
E	DC	1	1000000011	29.0848	53.9248	0.00171137	0.493266	0.000844165
E	DC	1	1000000012	44.8458	6.5923	0.00192695	0.446188	0.000859778
E	DC	1	1000000013	26.4469	15.0948	0.0012363	0.462695	0.000572029
E	DC	1	1000000014	39.036	45.3971	0.00207747	0.486566	0.00101083
E	DC	1	1000000015	45.2951	13.9074	0.00172634	0.605468	0.00104524
E	DC	1	1000000016	38.6313	1.05175	0.00174985	0.632334	0.00110649
E	DC	1	1000000017	19.7847	70.6863	0.00189701	0.4139	0.000785172
E	DC	1	1000000018	33.8041	3.69041	0.00208436	0.544244	0.0011344
E	DC	1	1000000019	16.9796	176.307	0.00164377	0.467559	0.000768561
E	DC	1	1000000020	45.6595	34.9195	0.00199403	0.597285	0.001191
E	DC	2	1000000000	18.8028	3.95083	0.00186847	0.292786	0.000547062
E	DC	2	1000000001	12.1859	8.58761	0.00330017	0.159377	0.000525971
E	DC	2	1000000002	13.3926	27.8927	0.00155905	0.360144	0.00056148
E	DC	2	1000000003	16.6501	45.1297	0.00252941	0.221568	0.000560435
E	DC	2	1000000004	18.9679	85.8384	0.00242061	0.219114	0.000530389
E	DC	2	1000000005	12.0791	16.6156	0.00324537	0.196091	0.000636387
E	DC	2	1000000006	19.8007	25.4259	0.00324841	0.218662	0.000710304
E	DC	2	1000000007	8.65632	100.368	0.00230805	0.299685	0.000691687
E	DC	2	1000000008	33.0233	7.97861	0.0025161	0.398983	0.00100388
E	DC	2	1000000009	27.9957	62.7065	0.00281339	0.351895	0.000990017
E	DC	2	1000000010	15.0355	127.637	0.0030209	0.16042	0.000484613
E	DC	2	1000000011	15.2004	47.7548	0.00253438	0.214372	0.000543299
E	DC	2	1000000012	28.9958	87.827	0.00193374	0.206376	0.000399077
E	DC	2	1000000013	28.4112	80.1962	0.00200193	0.352315	0.00070531
E	DC	2	1000000014	19.4291	29.4858	0.00182638	0.342201	0.000624988
E	DC	2	1000000015	24.7262	129.481	0.00225207	0.280975	0.000632775
E	DC	2	1000000016	19.7559	80.0664	0.00208737	0.399525	0.000833957
E	DC	2	1000000017	22.7852	103.049	0.00152329	0.352876	0.000537531
E	DC	2	1000000018	31.7294	158.532	0.0023101	0.314879	0.0007274
E	DC	2	1000000019	23.119	28.2157	0.00246776	0.343651	0.000848046
E	DC	2	1000000020	21.8522	150.031	0.00140653	0.39714	0.000558588
E	DC	2	1000000021	30.059	20.1467	0.00269362	0.296306	0.000798137
D	DC	1	1000000000	8.62492	89.9487	0.000674107	0.186308	0.000125592
D	DC	1	1000000001	31.2277	18.3328	0.00105539	0.452602	0.000477669
D	DC	1	1000000002	12.2545	3.24973	0.000589454	0.302358	0.000178226
D	DC	1	1000000003	10.7584	15.117	0.000522756	0.262052	0.000136989
D	DC	1	1000000004	22.1829	53.7261	0.000732872	0.308967	0.000226433
D	DC	1	1000000005	15.8415	6.96424	0.00122784	0.27878	0.000342297
D	DC	1	1000000006	25.8463	51.0048	0.00141363	0.312126	0.000441232
D	DC	1	1000000007	28.427	15.3496	0.00143491	0.401216	0.00057571
D	DC	1	1000000008	22.6922	48.4053	0.000682486	0.57385	0.000391644
D	DC	1	1000000009	8.92951	83.0117	0.00102113	0.0959223	9.79495e-05
D	DC	1	1000000010	25.5447	3.65513	0.000947796	0.311722	0.000295449
D	DC	1	1000000011	13.8269	26.1485	0.00144949	0.201157	0.000291575
D	DC	1	1000000012	14.1134	90.8981	0.00133938	0.124509	0.000166764
F	DC	1	1000000000	17.8665	9.05421	0.0031337	0.0960065	0.000300856
F	DC	1	1000000001	24.5721	18.3621	0.00308532	0.144865	0.000446956
F	DC	1	1000000002	38.8873	13.7818	0.00299824	0.368184	0.0011039
F	DC	1	1000000003	15.2616	37.9666	0.00289422	0.146196	0.000423123
F	DC	1	1000000004	19.822	0.3125	0.00264363	0.111315	0.000294277
F	DC	1	1000000005	29.2754	17.0911	0.00230451	0.182565	0.000420723
F	DC	1	1000000006	9.95747	29.2466	0.0030598	0.142664	0.000436524
F	DC	1	1000000007	18.9723	1.22305	0.00226635	0.220826	0.000500468
F	DC	1	1000000009	11.2457	60.5169	0.0020462	0.229395	0.00046939
F	DC	1	1000000010	17.3537	71.3423	0.00278017	0.223547	0.000621495
F	DC	1	1000000011	12.997	45.5932	0.00261859	0.221567	0.000580193
F	DC	2	1000000000	15.0216	14.1521	0.00365423	0.158524	0.000579286
F	DC	2	1000000001	7.36235	43.0759	0.00384508	0.175816	0.000676026
F	DC	2	1000000002	34.4372	43.0689	0.00461424	0.266617	0.00123023
F	DC	3	1000000000	34.1502	22.1249	0.00369102	0.158571	0.000585289
F	DC	3	1000000001	15.8475	6.57761	0.00303718	0.120073	0.000364685
F	DC	3	1000000002	17.6197	19.2924	0.00337433	0.175351	0.000591692
F	DC	3	1000000003	18.7303	33.6397	0.00304907	0.0928243	0.000283028
F	DC	3	1000000004	33.5977	6.14675	0.00327228	0.133256	0.000436049
A	IF	NA	1000000000	30.6602	25.9362	0.00232632	0.323394	0.000752316
A	IF	NA	1000000001	22.4041	6.67884	0.00225939	0.214765	0.000485239
A	IF	NA	1000000002	22.3982	72.8553	0.0021446	0.293975	0.000630458
A	IF	NA	1000000003	18.7627	88.8492	0.00211485	0.140134	0.000296363
A	IF	NA	1000000004	19.6286	156.418	0.00327284	0.149142	0.000488118
A	IF	NA	1000000005	50.2672	144.311	0.00180438	0.222058	0.000400678
A	IF	NA	1000000006	16.7015	157.099	0.00198843	0.111946	0.000222597
A	IF	NA	1000000007	23.3928	30.8628	0.00209195	0.158914	0.00033244
A	IF	NA	1000000008	33.5432	9.54766	0.0024354	0.174499	0.000424974
A	IF	NA	1000000009	18.5069	81.8602	0.00210138	0.159256	0.000334657
A	IF	NA	1000000010	18.6145	30.2717	0.001785	0.247828	0.000442371
A	IF	NA	1000000011	23.3604	151.577	0.00238653	0.269183	0.000642413
A	IF	NA	1000000012	30.1748	94.0098	0.00169074	0.297517	0.000503025
A	IF	NA	1000000013	29.0028	126.705	0.0021562	0.282563	0.000609264
A	IF	NA	1000000014	30.0215	101.522	0.00194663	0.106703	0.000207711
A	IF	NA	1000000015	26.1103	55.8054	0.00155624	0.281617	0.000438261
A	IF	NA	1000000016	30.2093	34.7028	0.00304453	0.17427	0.000530568
B	IF	NA	1000000000	20.1464	111.815	0.00103343	0.425845	0.00044008
B	IF	NA	1000000001	28.6353	82.4279	0.00105422	0.333187	0.000351252
B	IF	NA	1000000002	44.8333	59.507	0.00141409	0.114477	0.000161881
B	IF	NA	1000000003	34.5905	174.824	0.00147372	0.0873244	0.000128692
B	IF	NA	1000000004	28.0094	116.615	0.00150011	0.183134	0.00027472
B	IF	NA	1000000005	31.9394	80.2181	0.00103675	0.221636	0.000229781
B	IF	NA	1000000006	32.9789	29.4967	0.00175374	0.085272	0.000149545
B	IF	NA	1000000007	34.4405	97.8451	0.00130747	0.0642461	8.40001e-05
B	IF	NA	1000000008	17.4418	164.444	0.00151836	0.179342	0.000272306
B	IF	NA	1000000009	20.3416	72.3447	0.00144054	0.140848	0.000202899
B	IF	NA	1000000010	25.673	38.4935	0.00130586	0.136464	0.000178203
B	IF	NA	1000000011	39.0143	149.597	0.00194399	0.133053	0.000258655
B	IF	NA	1000000012	35.0436	37.4116	0.0014718	0.353318	0.000520013
B	IF	NA	1000000013	38.0765	38.337	0.00237789	0.0844662	0.000200851
B	IF	NA	1000000014	37.6138	46.2704	0.00119676	0.222011	0.000265693
B	IF	NA	1000000015	48.1162	65.6663	0.00133533	0.290642	0.000388104
B	IF	NA	1000000016	8.64751	57.747	0.000845484	0.376663	0.000318463
C	IF	NA	1000000000	22.1259	125.382	0.00311476	0.0373458	0.000116323
C	IF	NA	1000000001	49.8729	174.292	0.00235176	0.118615	0.000278954
C	IF	NA	1000000002	62.0872	44.4909	0.00232076	0.14374	0.000333587
C	IF	NA	1000000003	19.6275	52.3779	0.00193485	0.122842	0.000237682
C	IF	NA	1000000004	36.5229	7.58003	0.00125873	0.213602	0.000268867
C	IF	NA	1000000005	24.5062	135.658	0.0025069	0.0851087	0.000213359
C	IF	NA	1000000006	52.6103	38.9994	0.00312818	0.0953401	0.00029824
C	IF	NA	1000000007	27.8871	39.0568	0.00273095	0.0512315	0.000139911
C	IF	NA	1000000008	40.6374	88.7271	0.00212799	0.163551	0.000348036
C	IF	NA	1000000009	48.8429	114.202	0.00223732	0.121122	0.000270987
C	IF	NA	1000000010	17.1204	28.8595	0.00252915	0.095104	0.000240533
C	IF	NA	1000000011	27.845	137.792	0.00184808	0.200243	0.000370066
C	IF	NA	1000000012	15.2642	117.041	0.00269374	0.0807124	0.000217418
C	IF	NA	1000000013	23.8039	109.15	0.00275377	0.0831973	0.000229106
C	IF	NA	1000000014	49.5856	87.5235	0.00246105	0.117998	0.0002904
C	IF	NA	1000000015	83.1527	49.9832	0.0022854	0.205762	0.000470247
C	IF	NA	1000000016	53.9915	68.2617	0.0033971	0.139556	0.000474087
C	IF	NA	1000000017	10.9329	7.24606	0.002789	0.114175	0.000318435
C	IF	NA	1000000018	56.9582	98.2295	0.00200112	0.173721	0.000347638
C	IF	NA	1000000019	41.1614	82.5231	0.00248931	0.298273	0.000742495
C	IF	NA	1000000020	9.55784	41.426	0.00264983	0.057776	0.000153096
E	IF	NA	1000000000	10.4881	147.005	0.00224678	0.0658417	0.000147932
E	IF	NA	1000000001	30.0269	108.701	0.00303464	0.197255	0.000598595
E	IF	NA	1000000002	13.2422	1.46353	0.00290486	0.516875	0.00150145
E	IF	NA	1000000003	32.9376	14.9449	0.00251403	0.227567	0.000572109
E	IF	NA	1000000004	56.1704	27.1878	0.0035964	0.42797	0.00153915
E	IF	NA	1000000005	17.0926	69.5738	0.00258615	0.224117	0.000579598
E	IF	NA	1000000006	26.6864	89.3109	0.00208859	0.0932564	0.000194775
E	IF	NA	1000000007	44.7781	48.3955	0.00381152	0.457225	0.00174272
E	IF	NA	1000000008	28.3887	51.7396	0.00245647	0.277226	0.000680997
E	IF	NA	1000000009	33.9724	9.39716	0.00412483	0.41125	0.00169634
E	IF	NA	1000000010	28.151	5.67688	0.00303487	0.301157	0.000913971
E	IF	NA	1000000011	41.74	30.6901	0.00328759	0.299662	0.000985163
E	IF	NA	1000000012	41.8228	15.6031	0.00235251	0.374544	0.000881116
E	IF	NA	1000000013	34.2904	12.0201	0.00278406	0.187733	0.000522658
E	IF	NA	1000000014	25.9205	105.903	0.00332561	0.239559	0.00079668
E	IF	NA	1000000015	46.1743	57.4679	0.0019986	0.411607	0.000822636
E	IF	NA	1000000016	38.6997	77.8798	0.00267965	0.281047	0.000753108
E	IF	NA	1000000017	29.0206	6.94669	0.00172026	0.518887	0.000892618
E	IF	NA	1000000018	58.8338	65.3938	0.00215957	0.28285	0.000610834
D	IF	NA	1000000000	76.7632	85.3753	0.00134049	0.302872	0.000405999
D	IF	NA	1000000001	64.6295	54.2543	0.00116026	0.24569	0.000285064
D	IF	NA	1000000002	79.3579	5.82695	0.00117426	0.266216	0.000312606
D	IF	NA	1000000003	67.471	25.8214	0.00124271	0.176426	0.000219247
D	IF	NA	1000000004	48.2054	152.113	0.00157985	0.132346	0.000209086
D	IF	NA	1000000005	68.9293	50.9996	0.00101939	0.230034	0.000234494
D	IF	NA	1000000006	66.766	159.664	0.00119875	0.331624	0.000397534
D	IF	NA	1000000007	38.6933	75.2763	0.00184067	0.238363	0.000438746
D	IF	NA	1000000008	59.2522	128.482	0.00196216	0.26221	0.0005145
D	IF	NA	1000000009	79.0149	88.701	0.00184639	0.253647	0.000468332
D	IF	NA	1000000010	104.347	172.623	0.00120463	0.264833	0.000319026
D	IF	NA	1000000011	80.2564	153.872	0.00143656	0.33729	0.000484538
D	IF	NA	1000000012	15.7541	40.155	0.00149393	0.150805	0.000225293
D	IF	NA	1000000013	36.1413	13.8949	0.00149368	0.069061	0.000103155
F	IF	NA	1000000000	40.8808	120.544	0.00297993	0.421803	0.00125694
F	IF	NA	1000000001	65.6108	22.1767	0.00278205	0.0724461	0.000201549
F	IF	NA	1000000002	82.8455	48.3572	0.00327475	0.143213	0.000468989
F	IF	NA	1000000003	83.7077	64.576	0.00119914	0.233879	0.000280453
F	IF	NA	1000000004	39.5605	4.0431	0.00132548	0.172568	0.000228736
F	IF	NA	1000000005	71.7744	2.77877	0.00178951	0.424963	0.000760477
F	IF	NA	1000000006	103.926	76.0856	0.0014014	0.32437	0.000454573
F	IF	NA	1000000007	124.131	88.0997	0.0013314	0.263104	0.000350296
F	IF	NA	1000000008	53.3712	57.8472	0.00154877	0.209923	0.000325123
