# Supplementary material for: Hair follicle dermal condensation forms via Fgf20 primed cell cycle exit, cell motility, and aggregation
Source: eLife. 2018 Jul 31;7:e36468. doi: 10.7554/eLife.36468 (PMC6107334; doi:10.7554/eLife.36468)
Supplement: Figure 5—figure supplement 1—source data 1. — Values used to quantify cell density in E16.5 dermis in wildtype, K14-Edar, and K14-Edar;Fgf20-/- samples (Figure 5—figure supplement 1—source data). [file elife-36468-fig5-figsupp1-data1.xlsx]

## Sheet: Figure 5--figure supplement
Figure 5--figure supplement 1C
# cells/mm^2	Wildtype	K14-Edar	K14-Edar;Fgf20-/-
	12759.3	13380.9	12332.8
	13764.3	13349.8	9231.23
	13162.6	11247.3	12377
	12959.5	12965.1	11280.8
	15409.4	14021.9	12615
	11551.5	12604.4	12840.3
