# Supplementary material for: Hair follicle dermal condensation forms via Fgf20 primed cell cycle exit, cell motility, and aggregation
Source: eLife. 2018 Jul 31;7:e36468. doi: 10.7554/eLife.36468 (PMC6107334; doi:10.7554/eLife.36468)
Supplement: Figure 5—source data 1. — Values used to quantify fold change in expression of Etv5, Spry4, Dusp6, and Spred1 in FGF20-treated vs. BSA-treated Fgf20-/- dermis (Figure 5—figure supplement 1C). [file elife-36468-fig5-data1.xlsx]

## Sheet: Figure 5
Figure 5B
Fold change	Etv5	Spry4	Dusp6	Spred1	Bcl6
	1.34063	4.39641	2.76481	2.16774	1.41421
	1.16102	6.13938	1.53392	2.03799	1.61328
	1.52675	2.20118	1.54914	2.95977	2.86791
	1.70714	2.60272	1.44075	1.40338	0.737135
	2.01988	2.84878	2.82321	1.7887	1.6358
	1.62078	5.55065	1.30499	1.48452	1.37554
	1.44721	1.93631	1.98124		0.63728
		3.19151
