# Supplementary material for: Hair follicle dermal condensation forms via Fgf20 primed cell cycle exit, cell motility, and aggregation
Source: eLife. 2018 Jul 31;7:e36468. doi: 10.7554/eLife.36468 (PMC6107334; doi:10.7554/eLife.36468)
Supplement: Figure 6—figure supplement 1—source data 1. — Values used to quantify fibroblast wound closure in the presence of DMSO, SU5402, FGF9 +DMSO, or FGF9 +SU5402 (Figure 6—figure supplement 1A). Values used to quantify E13.5 primary fibroblast transwell migration in control, FGF9 in lower chamber, and FGF9 in seeding and lower chambers (Figure 6—figure supplement 1B). Values used to quantify fibroblast density in response to BSA or FGF9-loaded beads at 0–15 µm and 15–30 µm distance from the bead (Figure 6—figure supplement 1C). [file elife-36468-fig6-figsupp1-data1.xlsx]

## Sheet: Figure 6--figure supplement 
Figure 6--figure supplement 1A						Figure 6--figure supplement 1B					Figure 6--figure supplement 1C
% wound closure at	0h	4h	8h	24h		Reltive migration at 8h	None	Lower	Both		# cells / um^2	0-15 um range		15-30 um range
DMSO	0	13.1715	20.256	57.2502			1	0.939169	1.13205			Control	Fgf9	Control	Fgf9
DMSO	0	13.0976	23.554	67.5666			1	1.83442	1.55844			0.0101803	0.014361	0.0104661	0.0109162
DMSO	0	9.4942	14.2016	47.0013			1	2.9877	3.27049			0.0107203	0.0155204	0.0115354	0.0102658
DMSO	0	11.3827	26.6439	75.8056			1	4.52033	5.23577			0.00930251	0.0133393	0.00747075	0.0107212
DMSO	0	21.6112	38.9408	88.6479			1	2.94472	2.55779			0.0120844	0.0122081	0.00917418	0.00921875
							1	3.89412	4.66471			0.0130874	0.0112204	0.00897306	0.0116816
SU5402	0	12.0813	20.835	53.0694								0.0100467	0.0137601	0.00942487	0.0114743
SU5402	0	7.65487	15.3268	52.1615								0.00997872	0.0170286	0.012347	0.0113649
SU5402	0	13.5226	21.6693	59.9113
SU5402	0	12.6694	21.4386	59.2292
SU5402	0	16.7428	22.8616	57.0592
FGF9 + DMSO	0	14.2321	31.5183	93.2766
FGF9 + DMSO	0	13.6817	34.4432	100
FGF9 + DMSO	0	17.601	39.699	97.6868
FGF9 + DMSO	0	11.8817	32.0855	94.5762
FGF9 + DMSO	0	20.5253	43.1014	100
FGF9 + SU5402	0	7.37481	15.7194	50.0147
FGF9 + SU5402	0	9.12967	17.0833	61.8
FGF9 + SU5402	0	12.3999	21.6826	59.3325
FGF9 + SU5402	0	12.9259	24.2569	56.1959
FGF9 + SU5402	0	20.0737	25.3583	60.3536
