# Supplementary material for: Hair follicle dermal condensation forms via Fgf20 primed cell cycle exit, cell motility, and aggregation
Source: eLife. 2018 Jul 31;7:e36468. doi: 10.7554/eLife.36468 (PMC6107334; doi:10.7554/eLife.36468)
Supplement: Figure 6—figure supplement 2—source data 1. — Values used to quantify the percent of total cells expressing Fucci-mKO 30 µm surrounding the center of the bead (Figure 6—figure supplement 2E). [file elife-36468-fig6-figsupp2-data1.xlsx]

## Sheet: Sheet1
Figure 6-- figure supplement 2E
Treatment	BSA	FGF9	FGF20
%Fucci-mKO	38.5366	45.045	40.3361
	39.8438	52.8571	45.0549
	48.0392	50.5376	45.6897
	64.751	47.2574	48.6911
	46.5517	55.3571	51.751
	48.1481	65.7754	65.4971
	52.6946	63.4855	52.6627
	48.7805	68.6364	57.8652
	67.7019	62.1469	59.7561
	47.7778	76.7568	67.3077
			66.25
