# Supplementary material for: Hair follicle dermal condensation forms via Fgf20 primed cell cycle exit, cell motility, and aggregation
Source: eLife. 2018 Jul 31;7:e36468. doi: 10.7554/eLife.36468 (PMC6107334; doi:10.7554/eLife.36468)
Supplement: Figure 6—source data 1. — Values used to quantify fibroblast wound closure in the presence of DMSO, SU5402, FGF20+ DMSO, or FGF20+ SU5402 (Figure 6B). Values used to quantify E13.5 primary fibroblast transwell migration in control, FGF20 in lower chamber, and FGF20 in seeding and lower chambers (Figure 6C). Values used to quantify fibroblast density in response to BSA or FGF20-loaded beads at 0–15 µm and 15–30 µm distance from the bead (Figure 6E). Values used to quantify fibroblast nuclear sphericity in response to BSA or FGF20-loaded beads at 0–15 µm and 15–30 µm distance from the bead (Figure 6G). [file elife-36468-fig6-data1.xlsx]

## Sheet: Figure 6 
Figure 6B						Figure 6C					Figure 6E						Figure 6G
% wound closure at	0h	4h	8h	24h		Relative migration to control at 8 h	None	Lower	Both		# cells / um^2	0-15 um range		15-30 um range			Nuclear sphericity	0-15 um range		15-30 um range
DMSO	0	13.1715	20.256	57.2502			1	1.38576	2.02077			Control	Fgf20	Control	Fgf20			Control	Fgf20	Control	Fgf20
DMSO	0	13.0976	23.554	67.5666			1	1.51948	2.81494			0.0129558	0.0158427	0.014564	0.011942			0.787595	0.795512	0.84943	0.885273
DMSO	0	9.4942	14.2016	47.0013			1	3.04098	2.81148			0.0118302	0.0164939	0.0102696	0.00999123			0.907924	0.813422	0.874472	0.789237
DMSO	0	11.3827	26.6439	75.8056			1	1.43981	1.38426			0.0127362	0.0155158	0.0114548	0.0177223			0.702819	0.636793	0.881596	0.847116
DMSO	0	21.6112	38.9408	88.6479			1	4.98374	5.99187			0.0138734	0.0154806	0.0141583	0.0088254			0.818969	0.849486	0.603622	0.803142
							1	3.8794	4.14573			0.0110669	0.0194706	0.00899301	0.0159411			0.791407	0.761245	0.933318	0.891639
SU5402	0	12.0813	20.835	53.0694			1	3.41176	4.96471			0.0128948	0.0165751	0.0112441	0.0142631			0.782185	0.774177	0.898813	0.769597
SU5402	0	7.65487	15.3268	52.1615								0.0133658	0.0131213	0.0113716	0.0109701			0.806235	0.693872	0.872944	0.666825
SU5402	0	13.5226	21.6693	59.9113								0.0143399	0.018246	0.0126144	0.0151448			0.812086	0.838918	0.608773	0.761282
SU5402	0	12.6694	21.4386	59.2292								0.0142321	0.0185785	0.0109833	0.0151272			0.888639	0.781858	0.935908	0.873851
SU5402	0	16.7428	22.8616	57.0592														0.90846	0.729804	0.509573	0.735474
																		0.879169	0.771689	0.895092	0.783561
FGF20 + DMSO	0	10.7964	24.8164	85.5402														0.860698	0.798012	0.789613	0.894003
FGF20 + DMSO	0	17.6504	33.3214	98.0435														0.877351	0.51036	0.825679	0.695048
FGF20 + DMSO	0	16.7607	32.9513	99.0467														0.889189	0.823326	0.89956	0.826181
FGF20 + DMSO	0	14.7222	26.7337	90.5502														0.922627	0.414947	0.838828	0.796315
FGF20 + DMSO	0	21.8509	40.9698	96.4197														0.891162	0.785384	0.881223	0.516229
																		0.902126	0.75234	0.908692	0.79654
FGF20 + SU5402	0	7.93868	22.4529	62.3928														0.866365	0.623217	0.866011	0.826017
FGF20 + SU5402	0	11.2619	19.6168	62.1433														0.823441	0.822703	0.843672	0.814646
FGF20 + SU5402	0	9.75007	22.8237	60.2689														0.93548	0.684199	0.845924	0.830493
FGF20 + SU5402	0	11.8285	23.9231	60.5231														0.861193	0.741049	0.800146	0.854972
FGF20 + SU5402	0	17.2629	26.2878	70.5362														0.782099	0.710666	0.872713	0.771697
																		0.868561	0.770842	0.843292	0.794824
																		0.808918	0.731053	0.827765	0.824621
																		0.902356	0.715321	0.890448	0.801503
																		0.853832	0.556097	0.903241	0.725631
																		0.869641	0.705194	0.762121	0.800019
																		0.862406	0.798813	0.903701	0.874061
																		0.854138	0.635023	0.66095	0.834558
																		0.893329	0.722819	0.843343	0.774085
																		0.868644	0.603008	0.850716	0.602076
																		0.894514	0.738553	0.812844	0.633157
																		0.877122	0.731233	0.857176	0.612436
																		0.88299	0.787869	0.828711	0.778664
																		0.760627	0.730439	0.851263	0.594765
																		0.819816	0.544248	0.902591	0.624486
																		0.566095	0.774085	0.887679	0.747669
																		0.821414	0.602076	0.878045	0.716903
																		0.714071	0.633157	0.823952	0.802904
																		0.825714	0.612436	0.762409	0.752509
																		0.833427	0.778664	0.828657	0.722995
																		0.726853	0.594765	0.816398	0.815719
																		0.77322	0.624486	0.64104	0.756048
																		0.777407	0.747669	0.898319	0.719953
																		0.821429	0.716903	0.816456	0.70752
																		0.798987	0.802904	0.825041	0.910043
																		0.719717	0.752509	0.887997	0.838003
																		0.844621	0.722995	0.879092	0.828078
																		0.847686	0.815719	0.905598	0.855864
																		0.846977	0.756048	0.81306	0.771269
																		0.823154	0.719953	0.897572	0.787165
																		0.843818	0.70752	0.863516	0.855452
																		0.856792	0.750451	0.851237	0.869717
																		0.721754	0.734475	0.651058	0.806676
																		0.812734	0.860929	0.889766	0.773455
																		0.901804	0.880532	0.862004	0.883714
																		0.866755	0.823548	0.812711	0.920594
																		0.879334	0.816503	0.902751	0.819885
																		0.862586	0.800576	0.793483	0.791716
																		0.945558	0.585248	0.894893	0.812796
																		0.860176	0.595402	0.881869	0.800949
																		0.812647	0.738228	0.844688	0.848255
																		0.783789	0.81533	0.80406	0.869142
																		0.867646	0.698945	0.787043	0.837559
																		0.86534	0.778121	0.892321	0.832713
																		0.893804	0.840639	0.808668	0.80091
																		0.891354	0.648026	0.840053	0.784385
																		0.896948	0.693962	0.882692	0.846319
																		0.79862	0.626215	0.797343	0.834195
																		0.828829	0.743754	0.85869
																		0.883864	0.832179	0.87696
																		0.879563	0.699407	0.898383
																		0.898686	0.886378	0.898608
																		0.818595	0.80989	0.842353
																		0.861752	0.646365	0.849353
																		0.87576	0.603805	0.83036
																		0.820967	0.797774	0.845061
																		0.674292	0.808503	0.833851
																		0.814587	0.840612	0.757967
																		0.799426	0.776317	0.820954
																		0.789632	0.826687	0.804168
																		0.824049	0.843247	0.803625
																		0.884001	0.697283	0.859432
																		0.843353	0.716141	0.798973
																		0.863864	0.74774	0.885221
																		0.871176	0.762562
																		0.843474	0.543992
																		0.89312	0.820324
																		0.911185	0.640515
																		0.866433	0.644605
																		0.839324	0.726771
																		0.875417	0.579625
																		0.897963	0.79238
																		0.623451	0.643035
																		0.608065	0.618345
																		0.777954	0.76734
																		0.846061	0.710151
																		0.889663	0.793983
																		0.815194	0.431948
																		0.764058	0.806372
																		0.883601	0.581811
																		0.721087	0.720416
																		0.856264	0.752709
																		0.8695	0.842362
																		0.857783	0.641087
																		0.794395	0.849152
																		0.781507	0.792369
																		0.797604	0.799035
																		0.812698	0.789497
																		0.894766	0.795098
																		0.805624	0.845147
																		0.793064	0.79859
																		0.844679	0.769873
																		0.768995	0.735617
																		0.858929	0.725476
																		0.812757	0.776806
																		0.739974	0.783783
																		0.871329	0.838183
																		0.576958	0.817709
																		0.784788	0.724254
																		0.892041	0.803992
																		0.872135	0.78215
																		0.762846	0.874502
																		0.820704	0.60712
																			0.571955
																			0.793442
																			0.786566
																			0.824572
																			0.724106
																			0.679371
																			0.772869
																			0.745196
																			0.733222
																			0.632133
																			0.719563
																			0.759303
