# Supplementary material for: Hair follicle dermal condensation forms via Fgf20 primed cell cycle exit, cell motility, and aggregation
Source: eLife. 2018 Jul 31;7:e36468. doi: 10.7554/eLife.36468 (PMC6107334; doi:10.7554/eLife.36468)
Supplement: Figure 7—figure supplement 2—source data 1. — Table of reported IC50 values for SU5402, BGJ398, and XL154 for the FGFR1 and VEGFR2 receptors. Equivalent dose represents the concentration required to inhibit either FGFR1 or VEGFR2 to the same degree as SU5402. [file elife-36468-fig7-figsupp2-data1.xlsx]

## Sheet: Sheet1
Inhibitor	FGFR1 IC50 (cell-free assay)	Equivalent dose	VEGFR2 IC50 (cell-free assay)	Equivalent dose
SU5402	30 nM	20 uM	20 nM	20 uM
BGJ398	0.9 nM	666 nM	180 nM	2.2 uM
XL154	5.294 uM	3.5 uM	0.035 nM	35 nM
