# Supplementary material for: Hair follicle dermal condensation forms via Fgf20 primed cell cycle exit, cell motility, and aggregation
Source: eLife. 2018 Jul 31;7:e36468. doi: 10.7554/eLife.36468 (PMC6107334; doi:10.7554/eLife.36468)
Supplement: Figure 7—source data 1. — Values used to quantify E14 + 12 hr culture with DMSO or SU5402 DC normalized cell numbers (Figure 7B). Values used to quantify E14 + 12 hr culture with DMSO or SU5402 distance of DC cells (Figure 7C). Values used to quantify DC cell number at E14 and after 12 hr culture with SU5402. (Figure 7E). Values used to quantify DC cell distance at E14 and after 12 hr culture with SU5402 (Figure 7F). [file elife-36468-fig7-data1.xlsx]

## Sheet: Figure 7 
Figure 7B				Figure 7C				Figure 7E				Figure 7F
# Sox2+ DC cells	DMSO 12h	SU5402 12h		Average distance to placode (um)	DMSO 12h	SU5402 12h		# Sox2+ DC cells	0h control	SU5402 12h		Average distance to placode (um)	0h control	SU5402 12h
	107	78			6.5053	6.24971			92	70			0.974281	0.741301
	90	62			5.85927	6.37464			83	78			0.878971	0.826021
	84	54			6.78164	7.06734			80	61			0.847201	0.645991
	74	84			6.69912	6.41601			101	86			1.06959	0.910741
	78	73			6.68034	7.0603			93	71			0.984871	0.751891
	81	80			6.8551	7.01713			104	88			1.10136	0.931921
	96	68			6.26415	6.37852			108	71			1.14372	0.751891
	86	58			6.24858	5.88077			105	87
	94	63							108	78
	95	88							109	83
	95	95							104	84
	84	84
	93	56
	102	39
